# Supplementary material for: Opening the Door to Registered Reports: Census of Journals Publishing Registered Reports (2013–2020)
Source: Oxford University Press journal article supplement (doi:10.1525/collabra.24404), 2021-01-01
Supplement: collabra_2021_7_1_24404_61689.docx [file collabra_2021_7_1_24404_61689.docx]

**Supplemental Materials**

**Table S1**

***Original Journal Language for Author Masked Review Policy***

| Category in Manuscript | Original Journal Language |
| --- | --- |
| Unable to find author masking policies | Missing  Two-step review process  Open peer review  Open review  Optional open peer review |
| Keep both authors and reviewers anonymous | Double-blind review  Double-blind review for pre-print  Double-blind review when not immediately rejected  Double-blind, reviewers revealed at publication |
| Reviewers anonymous but not authors | Author blinded review  Single-blind review  Single-blind review (reviewer knows identity of author) |
| No masking (neither authors nor reviewers are anonymous) | No  No blinding  None  Unmasked review  Open non-anonymous peer review |
| Options for masking | Author’s requested masked review  Author's optional blind review  Author's request single-blind review  Author's request single-blind review  Authors request blind review  Authors request double-blind review  Blind review optional  Double-blind review optional  Double-blind review, single-blind upon request  Optional anonymous review  Optional author blinding  Optional blind review  Optional double-blind review  Optional masked blind review  Optional masked review  Optional masked review  Optional single-blind review  Optional single-blind review  Single or double-blind review  Single-blind or non-blind review  Single-blind review (optional double-blind review)  Single-blind review or double-blind review  Single-blind, double-blind per author request |
| Other | Partial triple-blind review  Triple-blind review |
| Ambiguous | Anonymous peer review  Anonymous review  Blind peer review  Masked peer review  Masked peer review  Yes |

**Table S2**

***Example Language from Journal Policies***

| Policy | Allowed | Not Allowed |
| --- | --- | --- |
| Changes to Introduction | “The Introduction from the study preregistration may be altered to update the literature review. The stated hypotheses may not be amended or appended.” - Journal of the American Academy of Child and Adolescent Psychiatry  “The stated hypotheses cannot be altered or appended. However, it is acceptable for the tone and content of an Introduction to be shaped by the results. Moreover, depending on the timeframe of data collection, new relevant literature may have appeared between registration review and full manuscript review. Therefore, authors will be allowed to update part of the Introduction.” - *International Journal of Psychophysiology* | “The Stage-2 revision should contain essentially the same Introduction and Method sections as the Stage-1 submission, plus the new *Results* and *Discussion* sections.” - Crisis (The Journal of Crisis Intervention and Suicide Prevention)  “Introduction/Background section which: Reviews the relevant literature that motivates the research question and fully describes the study aims and hypotheses. Note that after provisional acceptance this section cannot be altered.” - *Royal Society Open Science* |
| Exploratory Analysis | “As well as the planned analyses, additional exploratory analyses are welcome in the final report as long as they are clearly labelled as such.” - *Brain Communications*  “While Registered Reports are focused on testing pre-registered hypotheses, the final manuscript can certainly include exploratory analyses. Registered Reports allow a clear distinction between *confirmatory* (that is, pre-registered) hypotheses testing and *exploratory* analyses” - *AERA Open* | No journal with this policy |
| Multiple Studies | “The Registered Report category welcomes multiple- study submissions.” - *Experimental Psychology*  “One deviation from the ‘traditional’ manuscript format involves studies in which follow-up experiments rely on the outcome of prior ones. In this case the authors have two options.  **Option 1:** Lay out the specific logic for follow-up experiments, carefully outlining which experiments will be performed under what research outcomes from prior experiments. A flow-chart format may be employed.  **Option 2:** Authors can submit the first experiment as a stand-alone RR and pass subsequent follow-up experiments through the RR process (as successive Stage 1 submissions) as they go.” - *Journal of Child Language* | No journal with this policy |
| Preliminary Studies | “...should follow the format: 1) Abstract, 2) Introduction, 3) Methods, 4) Preliminary results from any pilot experiments (if applicable)” - *Frontiers in Neuroscience*  “It is expected that established methodologies will be used; if alternate or adapted methodologies are used or if the researcher is new to the field, pilot studies may be required to demonstrate the validity of the proposed methodology and determine appropriate power for the study.” - *Infancy* | “Note that this section should be written in the future tense and no pilot study should have yet been carried out.” - *Human Resource Management Journal*  “*Clocks & Sleep* does not publish pilot studies or studies with inadequate statistical power.” - *Clocks and Sleep* |
| Power | “Power analysis, when undertaken, must be based on the *lowest* available or meaningful estimate of the effect size, achieving an *a priori* power (1 - β) of 0.9 or higher for all proposed hypothesis tests…. For inference by Bayes factors, authors should discuss a target strength of evidence that is likely to be useful to readers (e.g., that a Bayes factor of 10 will be suitably convincing for the effect in question).” - *Collabra* | No journal with this policy |
| Secondary Data | “For proposed research using archival data sources, confirm that data analyses have not been and will not be conducted until receipt of a conditional acceptance.” - *Stress and Health*  “Please contact the Editor-in-Chief to discuss proposals where the data have already been collected, such as archival data” - *Evolution and Human Behavior* | “RRs at Linguistics are not yet available for analyses of secondary data.” - *Linguistics*  “A backbone of this publishing format is that the data for which the registration is undertaken are not available at the time of writing, i.e. no data collection has started yet. Therefore, this publishing format is closed to secondary data analysis projects, unless a very strong case can be made that the data were not available at the time of conception of the study.”  - *Quality of Life Research* |
